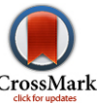

# Response of Vegetation and Soil Carbon and Nitrogen Storage to Grazing Intensity in Semi-Arid Grasslands in the Agro-Pastoral Zone of Northern China

Min-yun Xu<sup>1,2\*</sup>, Fan Xie<sup>3</sup>, Kun Wang<sup>4</sup>

**1** Department of Ecology, College of Urban and Environmental Sciences, Peking University, Beijing, P.R. China, **2** College of Animal Science & Technology, Hebei Agricultural University, Baoding, Hebei province, P.R. China, **3** Department of Party Affairs, China National Light Industry Council, Beijing, P.R. China, **4** College of Animal Science & Technology, China Agricultural University, Beijing, P.R. China

## Abstract

Overgrazing has been the primary cause of grassland degradation in the semi-arid grasslands of the agro-pastoral transition zone in northern China. However, there has been little evidence regarding grazing intensity impacts on vegetation change and soil C and N dynamics in this region. This paper reports the effects of four grazing intensities namely un-grazed (UG), lightly grazed (LG), moderately grazed (MG) and heavily grazed (HG) on vegetation characteristics and soil properties of grasslands in the Guyuan county in the agro-pastoral transition region, Hebei province, northern China. Our study showed that the vegetation height, canopy cover, plant species abundance and aboveground biomass decreased significantly with increased grazing intensity. Similarly, soil organic carbon (SOC) and total nitrogen (STN) in the 0–50 cm were highest under UG (13.3 kg C m<sup>-2</sup> and 1.69 kg N m<sup>-2</sup>) and lowest under HG (9.8 kg C m<sup>-2</sup> and 1.22 kg N m<sup>-2</sup>). Soil available nitrogen (SAN) was significantly lower under HG (644 kg N hm<sup>-2</sup>) than under other treatments (725–731 kg N hm<sup>-2</sup>) in the 0–50 cm. Our results indicate that the pasture management of “take half-leave half” has potential benefits for primary production and livestock grazing in this region. However, grazing exclusion was perhaps the most effective choice for restoring degraded grasslands in this region. Therefore, flexible rangeland management should be adopted in this region.

**Citation:** Xu M-y, Xie F, Wang K (2014) Response of Vegetation and Soil Carbon and Nitrogen Storage to Grazing Intensity in Semi-Arid Grasslands in the Agro-Pastoral Zone of Northern China. PLoS ONE 9(5): e96604. doi:10.1371/journal.pone.0096604

**Editor:** Xiujuan Wang, Northern University of Maryland, United States of America

**Received:** September 7, 2013; **Accepted:** April 8, 2014; **Published:** May 12, 2014

**Copyright:** © 2014 Xu et al. This is an open-access article distributed under the terms of the Creative Commons Attribution License, which permits unrestricted use, distribution, and reproduction in any medium, provided the original author and source are credited.

**Funding:** This research was funded by Baoding Science and Technology Development Project (Grant No. 13zf063). The funder (URL: <http://www.bdsj.gov.cn/>) had no role in study design, data collection and analysis, decision to publish, or preparation of the manuscript.

**Competing Interests:** The authors have declared that no competing interests exist.

\* E-mail: xuminyun@pku.edu.cn

## Introduction

Grazing, the most common use of grasslands, can influence plant community structure, soil properties and nutrient cycling within the plant-soil system[1]. For instance, selective grazing caused changes in plant species composition[2] and influenced herbage production[3]. Several previous studies proposed that light and moderate grazing favored grasses and stimulated grassland productivity[4][5]. However, increasing grazing intensity, to some extent, generally decreased grassland productivity, canopy height and sward cover[6], but increased unpalatable species proportion[4], and destroyed soil aggregation[7]. Milchunas and Lauenroth[2] analyzed 236 grazing studies worldwide and found different results with dynamics of species composition, root biomass, soil organic C and soil N of grasslands not closely associated with grazed or non-grazed measurements. These contradictory findings suggested that the effects of grazing on nutrient cycling and ecosystem functioning still needs further study [2].

Soil water content was the most limiting factor for primary productivity in semi-arid rangelands[8]. Grazing intensity affected soil water conditions of grasslands through animal trampling and intake behavior. Trampling compacted soil and increased soil bulk density[9], which led to the reduction of storage capacity and supply of soil water and nutrients, ultimately decreasing soil

fertility and grassland productivity[10]. Naeth et al.[11] reported that soil water in grazed treatments was generally lower than in non-grazed grassland. However, grazing could have the opposite effect on soil water through removing vegetation, resulting in decreased evapo-transpiration [11].

With regard to soil C and N, previous investigations have produced very variable results. Grazing management usually has a negative effect [1][9][12] on soil C storage, with well-managed grazing was reported to enhance C sequestration [13][14]. However, Milchunas and Lauenroth[2] found that grazing management had no effect on soil C and N storage. In addition, Frank et al.[1] found heavy grazing did not reduce soil C but moderately grazed pasture contained less soil C compared to a non-grazed enclosure, which was attributed to changes in species composition. Bauer et al.[15] found greater total N content to a soil depth of 0.457 m in grazed than non-grazed grasslands. Schuman et al. [16] found 12 years of grazing under different stocking rates did not change the total C and N mass of in the top 60 cm of the plant-soil system, but changed the distribution of C and N among the system components, primarily via a significant increase in the of C and N mass in the root zone (0–30 cm) of the soil profile. Wu et al.[17] reported that the temperate grasslands of northern China could achieve significant C and N storage on decadal scales in the context of mitigating global climate change

by grazing elimination. He et al.[18] found that C and N storage in both the 0–10 cm and 10–30 cm soil layers decreased linearly with increasing stocking rates in northern China. They also found there existed an underlying transformation from soil C sequestration under light grazing to C loss under heavy grazing, which implied that grasslands used for grazing have the capacity to sequester C in the soil under appropriate grazing pressure[18]. These varied findings were likely associated with the differences in climate, soil properties, study sites, plant community composition and grazing management measurements [19], indicating that more studies are needed to further clarify C and N dynamics under different grazing intensities and grazing regions.

Scientists have already conducted numerous studies on the effects of grazing pressure on plant and soil properties of grasslands in northern China, but most have been in the pastoral zone [12][20]. Relatively little research has focused on the productivity and sustainability of grasslands in agro-pastoral areas[21]. The agro-pastoral transition zone in semi-arid northern China [22], is one of the world's largest agro-pastoral ecotones, with an area of  $69 \times 10^4$  km<sup>2</sup> and a population of approximately  $6.7 \times 10^7$ [23]. Grasslands in this area play an important role in providing ecological services, such as sequestering carbon, regulating nutrient cycling, affecting biodiversity and ecosystem functioning [24]. Overgrazing and land use changes that reduces the areas of forests and grasslands along with an increase in agricultural activity have intensified pressures on the regional grasslands, causing severe land degradation[25]. Therefore, it is very important to understand the effects of grazing intensity on plant characteristics and soil properties of grasslands in this region. The objectives of this study were to quantify the effects of grazing intensity on (i) biomass allocation patterns and vegetation characteristics, (ii) soil properties and C and N storage dynamics in soil, and (iii) the relationship between soil C and N storage and the grazing-induced variation in plant biomass allocation patterns.

## Materials and Methods

### Study sites

The research was conducted at the Guyuan Grassland Ecosystem Observation and Research Station of China Agricultural University (115°41'E, 41°46'N), in Hebei province, northern China (Figure 1). With elevation between 1300 to 1450 m a.s.l., this area belongs to a semi-arid agro-pastoral transitional region, with a typical continental climate. The mean annual precipitation and potential evaporation range from 350 to 450 mm and 1700 to 2300 mm, respectively (1990 to 2010), with 80% of precipitation occurring during the June through September growing season. The mean annual temperature ranges from 1 to 2°C (1990 to 2010). The region is characterized by open, flat land, alternating with undulating hilly land. Further details of physiographic characteristics of this region have been presented by Chen and Zhu[26]. Soils are classified as chestnut type soils (i.e. Calcic Kastanozems), which are equivalent to Calcic-orthic Aridisols in the US soil taxonomy classification system. Soil pH ranges from 7.79 to 8.49 [27]. The plant community is mainly dominated by *Leymus chinensis*, *Stipa grandis*, *Cleistogenes squarrosa*, *Agropyron michnoi*, and *Koeleria cristata* [28].

### Experimental design

In this study, four contiguous sites were selected based on the availability of reliable information on the grassland management history under the same environmental conditions. Prior to the establishment of the Guyuan Grassland Ecosystem Observation and Research Station in 2000, the area had not been grazed or

only lightly grazed by domestic livestock for about 20 years. These sites had been exposed to a 10-year controlled grazing experiment (2001 to 2011) using different grazing pressures by herds consisting of 70 to 80% goats and sheep and 20 to 30% Holstein and beef cattle. Stocking rate was the basis for the four grazing intensities used, un-grazed (UG), lightly grazed (LG), moderately grazed (MG) and heavily grazed (HG). Calculation of the stocking rate is defined in terms of number of sheep units/pasture area, where a sheep unit (in China) is defined as a 40 kg liveweight ewe nursing lamb(s) with daily forage consumption of 5 to 7.5 kg[29]. Based on their forage intake and this definition of a sheep unit, ten goats were equal to eight sheep, and five sheep were approximately equivalent to one Holstein or beef cow. Animals were kept in pens at night, so the input of faecal organic material was reduced. There was no application of additional fertilizers to the four experimental sites.

The UG grassland was a 10 ha area with no grazing or human disturbance for livestock production. The vegetation was dominated by *Leymus chinensis*, *Stipa grandis* and *Hordeum spontaneum*. The LG grassland carried 11.16 sheep units within a 12.0 ha area, and its stocking rate was 0.93 sheep units per ha, resulting in 20% grassland utilization. The vegetation was dominated by *Leymus chinensis*, *Potentilla lacinata*, and *Carex capricornis*. The MG grassland supported 74.52 sheep units within a 32.0 ha area, and its stocking rate was 2.33 sheep units per ha, resulting in 50% grassland utilization. The vegetation was dominated by *Leymus chinensis*, *Thermopsis lanceolata*, *Ixeris polycephala*, *Puccinellia altaica* Tzvel and *Iris lactea* var. *pall. chinensis* (Fish) Koidz. The HG grassland supported 114.50 sheep units within a 35.12 ha area, and its stocking rate was 3.26 sheep units per ha, resulting in 70% grassland utilization. The vegetation was dominated by *Leymus chinensis*, *Iris lactea* var. *pall. chinensis* (Fish) Koidz and *Stellera chamaejasme*.

### Sampling and field investigation

In each of the four experimental sites, three sampling plots (50 m×50 m) were selected with the constraint that they were at least 2.0 m from the margin to avoid any edge effects. In each sampling plot, three sampling quadrats were randomly selected using a 0.5×0.5 m metal frame along the diagonal gradients. The experiment comprised 36 quadrats (3 plots × 3 quadrats × 4 grazing intensities). The vegetation composition survey was performed during the peak standing biomass in early September of 2012. It included measurements of plant canopy cover, mean vegetation height, aboveground biomass (comprising live biomass, standing dead material and litter on the soil surface), and plant species abundance across the four grazing intensities. Plant species composition was estimated using three sampling quadrats along a 10 m line intercept located at the centre of each plot. Plant canopy cover was determined using point frames (a 0.5 m×0.5 m metal frame with 50 grids) combined with a visual estimation method. The standing crop was harvested near ground-level using hand shears. Surface litter and standing dead plant biomass were hand brushed to bare the sampling area after herbage was clipped. The material was oven-dried at 65°C to a constant weight.

To estimate root biomass, five soil cores were collected at 10 cm intervals to 50 cm depth using a soil core sampler (6 cm diameter) from each quadrat, and placed in mesh bags, then rinsed in water to remove soil and debris. The root samples were dried at 80°C to a constant weight. Final biomass estimates were converted to a kilogram per hectare basis using the area of the sample quadrat, or the surface area in the case of the roots.

For soil C and N analysis, five soil samples were collected from three quadrats in each sampling plot after the aboveground material was harvested. Soil samples were collected using a soil

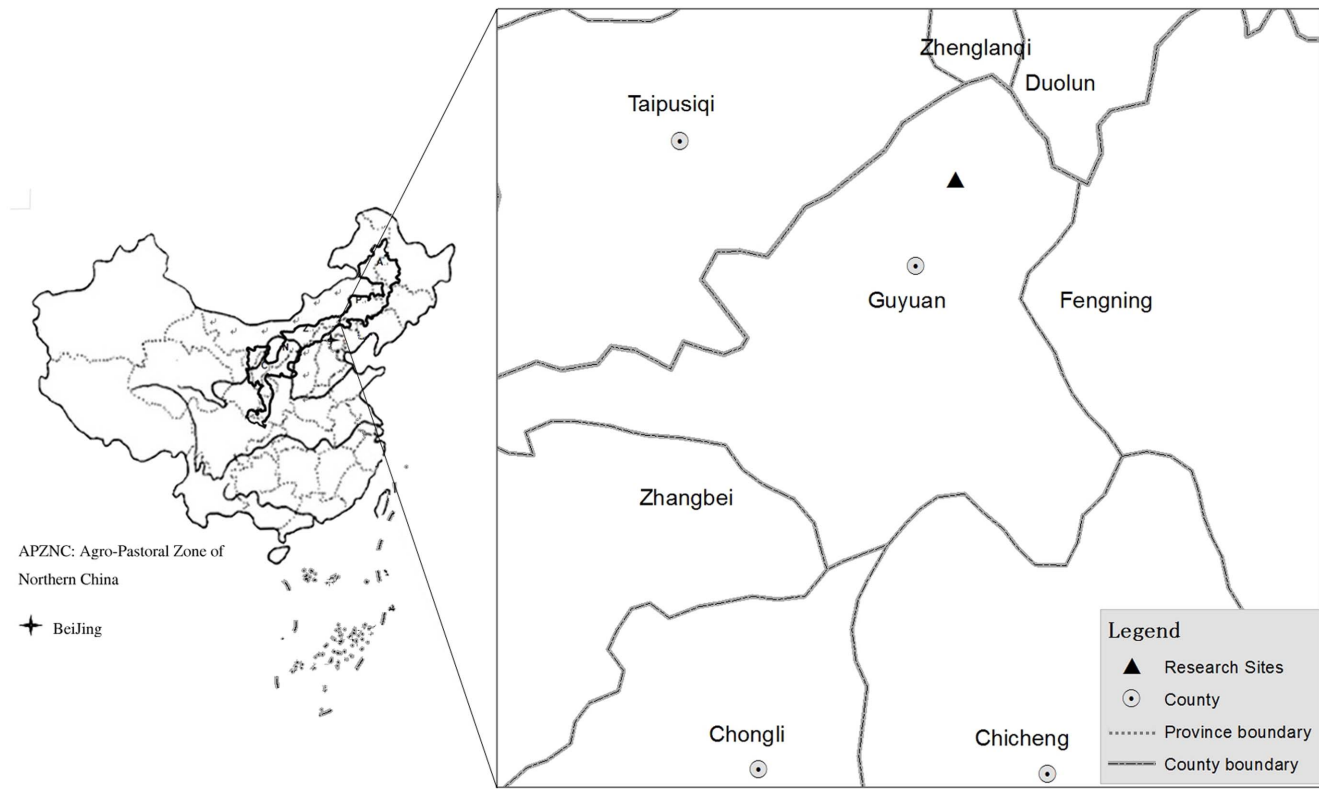

**Figure 1. Location of the research sites in the agro-pastoral zone of northern China.**  
doi:10.1371/journal.pone.0096604.g001

core sampler (6 cm diameter) and separated into 0–10, 10–20, 20–30, 30–40, and 40–50 cm increments. Five cores were taken from each layer and combined to provide an adequate sample for analyses. Samples were placed in sealed plastic bags in the field, then air-dried in a ventilated room, ground, then sieved to <2 mm to remove stones, root fragments and organic debris before chemical analyses. Soil samples were analyzed for organic C by the external heating method[30]. Soil total nitrogen (STN) content was determined using the Kjeldahl acid-digestion method with an auto-analyzer (Foss Inc., FIAStar5000, Sweden). Soil available nitrogen (SAN) was measured by the methods of Page et al.[31]. Soil bulk density was measured using samples taken with a volumetric (100 cm<sup>3</sup>) steel ring and calculated as the mass of oven-dry soil (105°C) divided by the core volume [32] for each depth increment. The measurement of bulk density allows the estimation of the total soil C and N storage under different grazing intensities. Soil water content was determined by weighing samples before and after oven-drying at 105°C for 8 h.

**Derived Variables Calculations**

Soil organic C (SOC, kg C m<sup>-2</sup>), STN (kg N m<sup>-2</sup>), and SAN (kg N hm<sup>-2</sup>) were calculated on an area basis to a soil depth of 50 cm as follows:

$$SOC = \frac{\sum_{i=1}^n D_i \times \rho_i \times OC_i}{100} \tag{1}$$

$$STN = \frac{\sum_{i=1}^n D_i \times \rho_i \times TN_i}{100} \tag{2}$$

$$SAN = 100 \sum_{i=1}^n D_i \times \rho_i \times AN_i \tag{3}$$

where i is the number of soil horizons, D<sub>i</sub> is the depth interval (cm) of the horizon i from the top soil down, ρ<sub>i</sub> is the soil bulk density (g cm<sup>-3</sup>) in the horizon i, OC<sub>i</sub> is the mean SOC content (g kg<sup>-1</sup>) in the horizon i, TN<sub>i</sub> and AN<sub>i</sub> represent total N concentration (g kg<sup>-1</sup>) and available N concentration (mg kg<sup>-1</sup>) respectively.

**Data analysis**

All statistical analyses were conducted using SPSS 16.0 for Windows (SPSS Inc., Chicago, IL, USA). Graphical presentation was done with SigmaPlot 10 (SPSS Inc., Chicago, IL, USA) and Adobe Acrobat XI Pro (Adobe Systems Incorporated, California, USA). Statistical analysis of each measured variable was conducted with the GLM (general linear model) procedure. One-way analyses of variance (ANOVA) were conducted to assess treatment effects on grassland vegetation characteristics, soil C and N storage properties. Individual system components (litter, standing dead and live biomass, roots by depth and soil by depth) were tested with a separate analysis of variance with replicate pastures treated as blocks. Error variances for depths were heterogeneous, so only univariate analysis was reported for depth. Least-significant-differences (LSD) procedures were used for comparisons between

means. Normal distribution and homogeneity of variance for each collective were tested using the Shapiro-Wilk's test and Levene's test. Significant differences for all of the statistical tests were evaluated at the level of  $P = 0.05$ .

## Results

### Vegetation characteristics

Our study demonstrated that the vegetation height, canopy cover, plant species abundance and aboveground biomass (live, standing dead and litter biomass) of grasslands in the agro-pastoral zone, decreased significantly with increased grazing intensity over 10-years (Table 1).

The UG plots had significantly higher plant species abundance than the other three plots with, the MG pasture displaying a similar species abundance to the LG and HG pastures. Our research also showed that increased grazing significantly decreased the canopy cover, with no significant difference between the UG and LG plots. The UG plots had significantly higher aboveground biomass, and HG plots had significantly lower value, while LG and MG plots showed intermediate values that were not significantly different. Belowground biomass of the MG plots was significantly higher than the other plots. Surprisingly, root biomass of the UG and HG pastures were similar and significantly lower than that of the LG pasture. This change was reflected in the higher root to shoot biomass ratios under the heavy grazing treatment compared to the light grazing treatment (Table 1). The total plant biomass in the LG and MG plots were similar, which were higher than those in the UG and HG plots. The HG plots had the lowest total biomass among the four grazing plots.

### Soil moisture content

Increasing grazing intensity generally decreased soil moisture content (Table 2). The overall trend was that the mean soil moisture content was highest in the UG plots and lowest in the

HG plots in the upper horizons (0–40 cm), and there was no significant difference in the 40–50 cm soil layer.

### Soil bulk density

Soil bulk density increased with each soil depth increment for each grazing intensity (Table 2). The changes in soil bulk density due to grazing were significant in the 0–10 cm soil layer among the different stocking rates. However, grazing had no effect on the bulk density of the lower horizons (10–50 cm) among the four grazing intensities.

### SOC, STN, and SAN concentrations

For SOC, the UG plots had significantly higher values, and the HG plots significantly lower values in the 0–10, 10–20 and 20–30 cm soil layers, while the LG and MG plots showed intermediate values that were not significantly different. In the 30–40 and 40–50 cm soil layers, the UG and LG plots had similar values that were significantly higher than the MG and HG plots, which did not differ. In all four plots, SOC decreased with successive soil depth increments (Figure 2A).

The STN values in the UG plots were significantly higher than the other three plots across all of the 0–50 cm soil layers. In the 0–10 and 10–20 cm soil layers, HG had the lowest STN (2.60 and 2.03 g kg<sup>-1</sup>), and there was no difference between the LG (2.97 and 2.53 g kg<sup>-1</sup>) and MG (2.93 and 2.46 g kg<sup>-1</sup>) plots. In the 20–30, 30–40 and 40–50 cm soil profiles, STN in LG, MG, and HG did not differ (Figure 2B). SAN in the HG plots was significantly lower than in the UG, LG, and MG plots across all the 0–50 cm soil layers (Figure 2C). STN and SAN were all higher in the surface soil and decreased with soil depth among all four grazing intensities.

### SOC, STN, and SAN storage

Trends in the storage of SOC, STN, and SAN (Figure 3) were mostly similar to the trends in their concentrations i.e. decreasing amounts of C and N with increasing grazing pressure. The

**Table 1.** Vegetation height, canopy cover, plant species abundance, aboveground biomass, belowground biomass, and R:S (root/shoot) ratio of grasslands under different grazing intensities in agro-pastoral zone.

| System components                            | UG             | LG            | MG            | HG             |
|----------------------------------------------|----------------|---------------|---------------|----------------|
| Vegetation height (cm)                       | 20.23±1.10a    | 17.10±0.99b   | 10.61±0.94c   | 5.68±0.87d     |
| Canopy cover (%)                             | 82.78±1.12a    | 78.44±1.03a   | 63.89±2.34b   | 40.89±1.82c    |
| Species abundance (species m <sup>-2</sup> ) | 41.67±1.94a    | 30.44±1.60b   | 33.89±1.52b   | 29.44±1.84b    |
| Aboveground biomass (g m <sup>-2</sup> )     | 575.79±5.68a   | 462.30±6.20b  | 439.51±5.18b  | 161.88±4.95c   |
| Live biomass                                 | 538.80±5.56a   | 436.13±6.26b  | 413.50±5.17b  | 149.36±4.93c   |
| Standing dead biomass                        | 21.92±0.28a    | 14.31±0.34b   | 13.39±0.23b   | 5.40±0.21c     |
| Surface litter biomass                       | 15.08±0.33a    | 11.96±0.17b   | 12.62±0.19b   | 7.11±0.17c     |
| Belowground biomass (g m <sup>-2</sup> )     | 1297.38±4.14c  | 1599.42±4.34b | 1694.09±4.62a | 1277.04±11.05c |
| 0–10 cm                                      | 940.90±6.17d   | 1162.92±8.64b | 1277.66±7.15a | 1026.85±8.69c  |
| 10–20 cm                                     | 162.17±1.99b   | 183.98±3.70a  | 186.13±2.42a  | 130.80±1.56c   |
| 20–30 cm                                     | 105.78±2.76b   | 128.04±2.19a  | 136.14±2.85a  | 57.08±0.64c    |
| 30–40 cm                                     | 62.61±2.36c    | 75.66±1.17a   | 68.16±2.11b   | 36.78±1.85d    |
| 40–50 cm                                     | 25.92±1.07b    | 48.81±1.03a   | 26.30±0.66b   | 25.53±2.23b    |
| Total plant biomass (g m <sup>-2</sup> )     | 1873.18 ±4.79b | 2061.72±8.12a | 2133.61±7.70a | 1438.92±10.80c |
| R:S                                          | 2.32±0.03c     | 3.57±0.05b    | 3.97±0.05b    | 8.32±0.39a     |

Note: UG, LG, MG, and HG are four grazing intensities: un-grazed; lightly grazed; moderately grazed; and heavily grazed. Values in the table are means ± SE (standard error). Different letters across the same component indicate significant difference for the different grazing intensities ( $p < 0.05$ ).

doi:10.1371/journal.pone.0096604.t001

**Table 2.** Soil moisture content and soil bulk density in grasslands to 50 cm soil depth under different grazing intensities in the agro-pastoral zone.

| Parameters                              | Depth intervals (cm) | Grazing intensities |             |              |             |
|-----------------------------------------|----------------------|---------------------|-------------|--------------|-------------|
|                                         |                      | UG                  | LG          | MG           | HG          |
| Soil moisture content (%)               | 0–10                 | 18.03±0.24a         | 16.58±0.35b | 15.95±0.29b  | 10.66±0.23c |
|                                         | 10–20                | 20.09±0.27a         | 18.98±0.14b | 19.23±0.22ab | 14.60±0.42c |
|                                         | 20–30                | 20.72±0.43a         | 18.06±0.18b | 17.56±0.32b  | 17.35±0.30b |
|                                         | 30–40                | 18.25±0.33a         | 17.47±0.47a | 15.45±0.25b  | 15.66±0.30b |
|                                         | 40–50                | 18.85±0.23a         | 17.97±0.34a | 18.26±0.30a  | 17.87±0.34a |
| Soil bulk density (g cm <sup>-3</sup> ) | 0–10                 | 1.05±0.03c          | 1.20±0.03b  | 1.23±0.01b   | 1.47±0.01a  |
|                                         | 10–20                | 1.38±0.01a          | 1.37±0.02a  | 1.40±0.03a   | 1.37±0.01a  |
|                                         | 20–30                | 1.47±0.01a          | 1.45±0.01a  | 1.46±0.02a   | 1.44±0.02a  |
|                                         | 30–40                | 1.46±0.01a          | 1.47±0.01a  | 1.47±0.02a   | 1.47±0.03a  |
|                                         | 40–50                | 1.56±0.02a          | 1.55±0.02a  | 1.54±0.03a   | 1.61±0.02a  |

Note: UG, LG, MG, and HG are four grazing intensities: un-grazed; lightly grazed; moderately grazed; and heavily grazed. Values in the table are means±SE (standard error). Difference letters within each row indicate significant difference for the different grazing intensities ( $p<0.05$ ). doi:10.1371/journal.pone.0096604.t002

exception was SAN, which increased with increasing grazing pressure in the 0–10 cm layer. The overall trend for SOC, STN, and SAN was a decline at each successive depth increment from 0 to 50 cm depth, except SAN, which was lower at 0–10 cm than 10–20 cm for the UG, LG, and MG. SOC differed significantly for the overall 0–50 cm profile decreasing from UG through LG and MG to HG (Figure 3A). The UG plots had significantly higher STN levels (1.69 kg m<sup>-2</sup>), HG plots were generally the lowest (1.22 kg m<sup>-2</sup>) and LG and MG were intermediate with no significant difference (Figure 3B). HG plots generally had the lowest SAN (644 kg hm<sup>-2</sup>) while the other grazing intensities did not differ for the overall 0–50 cm profile (Figure 3C). The C:N ratio across the entire soil profile was significantly greater for the LG pasture (9.74) compared to UG (7.71), MG (8.22) and HG pasture (7.93) (Figure 3D).

## Discussion

### Vegetation characteristics

Our results indicate that vegetation height, canopy cover, and plant species abundance decreased significantly with increased grazing intensities. This change in plant species abundance in our study is consistent with a study conducted in Inner Mongolia [33], which showed reduced species richness of the *Aneurolepidium chinensis* and *Stipa grandis* steppes with an increase in grazing intensity.

In our study, aboveground biomass decreased significantly with increased grazing intensity, which is not consistent with research from alpine meadow in the eastern Tibetan Plateau. Gao et al. [34] examined the seasonal dynamics of biomass and plant nitrogen content under light, moderate, and heavy grazing intensities and found that the highest live aboveground biomass occurred at sites with moderate grazing pressure. Possible explanations for heavy grazing reducing aboveground biomass include the decrease in abundance of the initially dominant and palatable graminoid species (e.g. *Leymus chinensis* and *Stipa grandis*) with increasing grazing intensity and the subsequent domination of unpalatable forbs and legumes became dominant. Likewise, the reduced canopy cover caused by selective grazing decreasing the area and resources available for plant production probably contributes to this change[3].

Our results showed that change of belowground biomass was different from that of aboveground biomass. These changes were not consistent with the findings of Su et al. [35], who observed that steppe vegetation grows better, produces more root exudates and develops a stronger root system in un-grazed areas compared to grazed areas in the semi-arid region of northern China. Other studies also showed variable findings for belowground biomass affected by grazing, such as an increase [34], decrease [36], or no effect[37]. In our grazing region, these results indicate that proper grazing intensity would stimulate vegetation growth in *Leymus chinensis* steppe, and overgrazing would decrease the steppe productivity.

### Soil moisture content

Grazing has significant impacts on soil water through its influence on infiltration via treading and altering evapo-transpiration through defoliation[38][39], i.e. soil water content declines under poor infiltration and/or high evapo-transpiration [38]. Our study showed soil water content decreased with increasing grazing intensity, consistent with previous research conducted to quantify the water fluxes as affected by grazing intensity in Inner Mongolia Grassland of northern China [40]. This is likely associated with a reduction in vegetation height, canopy cover, and biomass as grazing intensity increased. The poor ground cover directly contributed to the increase of soil evapo-transpiration loss. Larger vegetation and litter biomass remaining in the low grazing intensity, compared to heavier grazing, would increase the holding capacity of surface soil water [38].

### Soil bulk density

Increased bulk densities and lower soil moisture content, as a result of increased animal trampling, have been observed for different grazing animals in different grassland ecosystems [41]. Our results were consistent with previous research conducted on the Loess Plateau that showed grazing significantly increased soil bulk density and decreased soil moisture content[41]. He et al. [18] also found that bulk density of temperate grasslands in northern China increased linearly with increasing stocking rates in both the 0–10 cm and 10–30 cm soil layers.

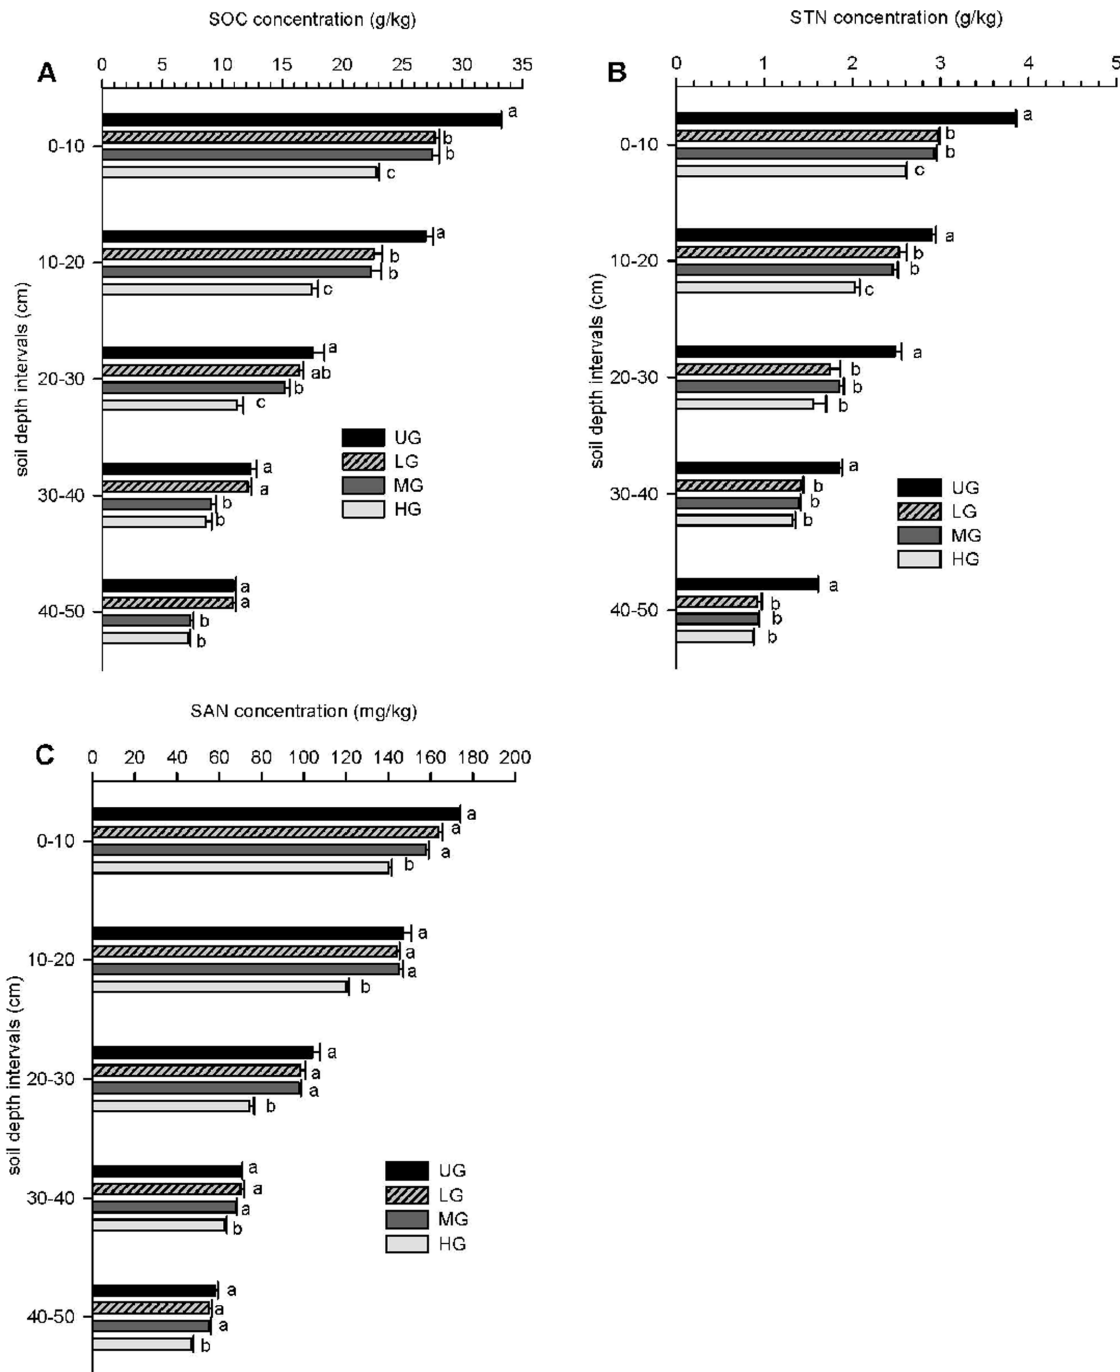

**Figure 2. Concentration of SOC (A), STN (B), and SAN (C) under different grazing intensities.** Soil organic carbon (SOC), soil total nitrogen (STN) and soil available nitrogen (SAN) concentrations in grasslands measured at 10 cm increments to depths of 50 cm in heavily grazed (HG), moderately grazed (MG), lightly grazed (LG), and un-grazed (UG) plots in the agro-pastoral zone. Within soil depth intervals, different letters indicate treatments are significantly different ( $p < 0.05$ ). Horizontal bars show S.E.  $n = 9$ . doi:10.1371/journal.pone.0096604.g002

**SOC, STN, and SAN**

Grazing exclusion can enhance soil C and N storage in temperate grasslands in northern China[18]. Reduction in soil C and N storage under long-term heavy grazing was reported previously from research carried out in this region [9][18][20]. Our results were consistent with previous studies. The response of SOC, STN, and SAN storage to different grazing intensities in our study may be due, in part, to the effects of grazing on belowground

biomass, litter and standing dead components of the aboveground biomass. Belowground biomass has been proven to be positively correlated with the size of the soil organic matter pool[42]. Repeated and frequent grazing resulted in decreased root elongation and biomass, and hence lower C inputs into the soil from the roots[43]. Livestock grazing altered plant composition, canopy cover, and community biomass. This may account for

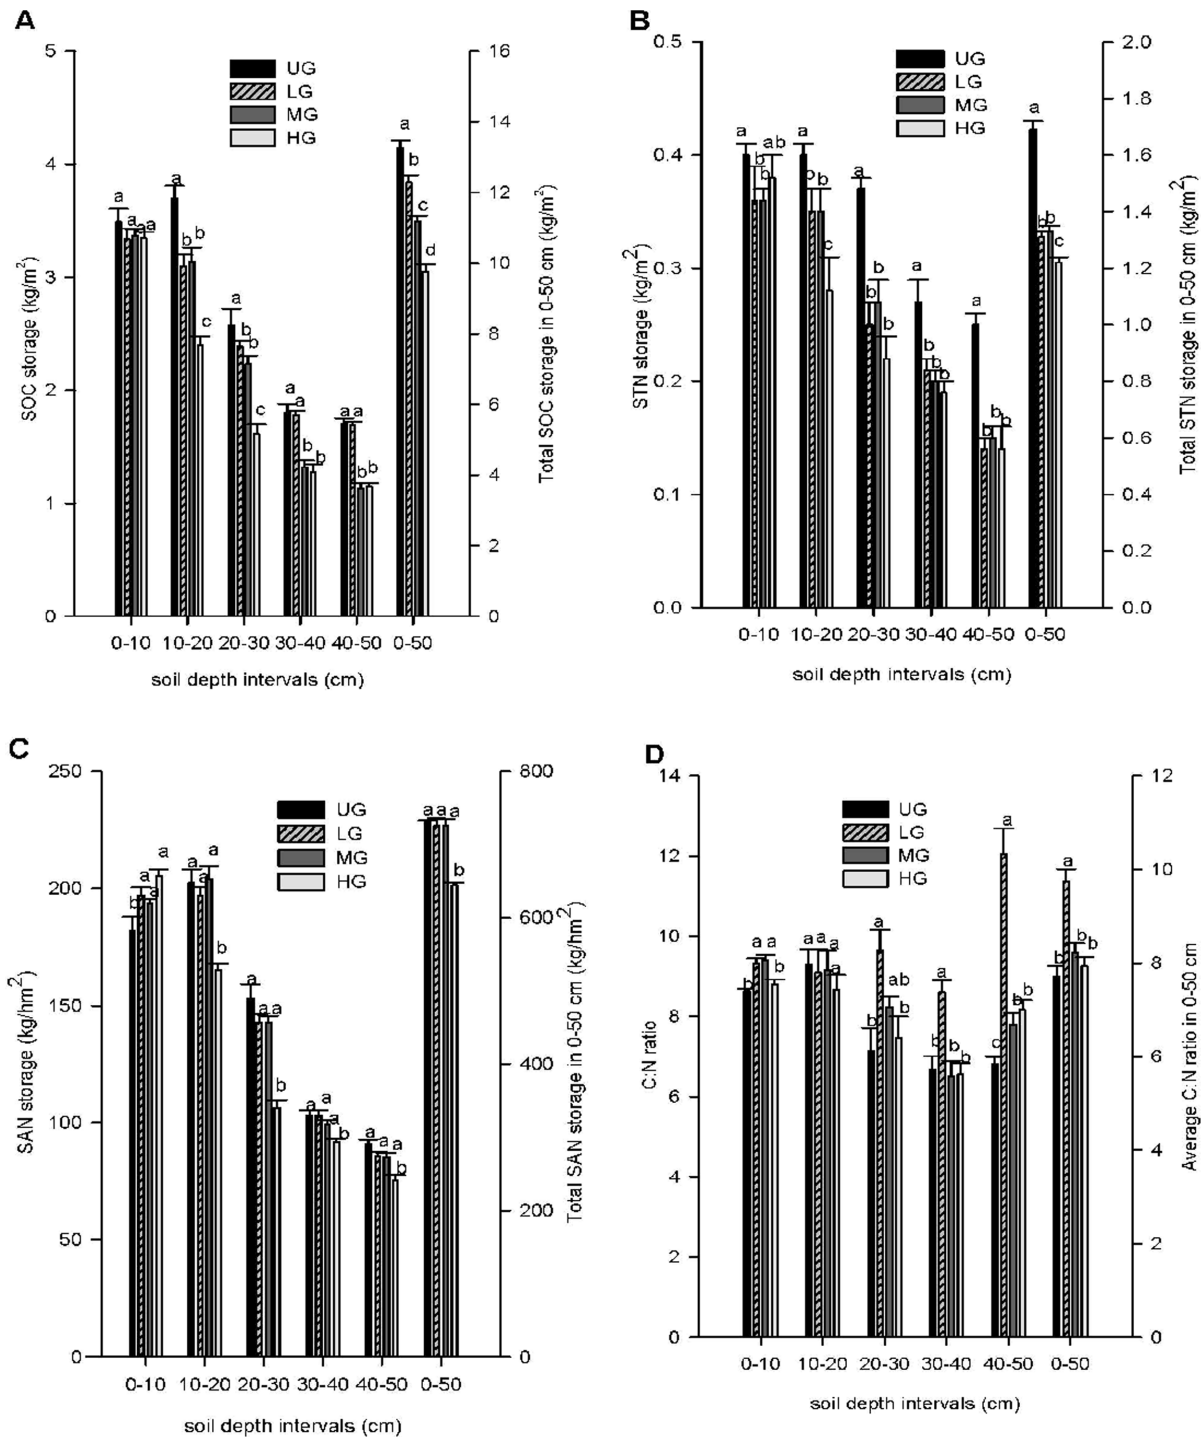

**Figure 3. SOC (A), STN (B), SAN (C) storage and C:N ratio (D) under different grazing intensities.** Soil organic carbon (SOC), soil total nitrogen (STN), soil available nitrogen (SAN) storage and C:N ratio in grasslands measured at 10 cm increments to depths of 50 cm in heavily grazed (HG), moderately grazed (MG), lightly grazed (LG) and un-grazed (UG) in the agro-pastoral zone. Within soil depth intervals, different letters indicate treatments are significantly different ( $p < 0.05$ ). Vertical bars show S.E.  $n = 9$ . doi:10.1371/journal.pone.0096604.g003

changes in the storage of SOC, STN, and SAN in the soil under different grazing intensities.

Possible explanations for overgrazing reducing SOC storage include vegetation production reduction, vegetation destruction, and change of environmental factors[1]. Grazing might also be expected to influence the organic C content of the soil by reducing

vegetation growth, the amount of litter and exposing the soil surface to erosion, which leads to direct soil nutrient losses [39]. Disruption of soil aggregate structure and surface soil crust due to trampling increases the decomposition of soil organic matter and renders the soil susceptible to water and wind erosion[44]. In temperate grasslands, considerable loss of SOC and soil N is

caused by wind and water erosion, particularly in areas with sandy soil and high wind speed [45]. Soils under HG in this region, with lower canopy cover and lower vegetation height, are vulnerable to wind erosion[21].

In the current study, a similar concentration of available N was found among UG, LG and MG plots, maybe due to organic matter and nutrient transfer via animal excreta[46], although there were significant differences in aboveground and belowground biomass among these plots. But defoliation in HG significantly decreased both STN and SAN by decreasing root and total production, resulting in reduced soil C and N [47]. The changes in plant community composition due to selective foraging can also indirectly influence soil N and available N by affecting plant litter decomposition rates and soil microbial activities [48].

The higher C:N ratio in LG suggests either a slower rate of decomposition or a greater portion of recent plant material in the residue[1]. The higher N content in the UG suggests that grazing reduced soil N [1]. A lower C:N ratio in UG perhaps means that higher soil moisture is stimulating litter decomposition, thereby releasing more N. Lower C:N ratios in MG and HG are perhaps because grazers return large amounts of N to the soil through urine and feces, increasing levels of available soil N [49]. However, grazing can also reduce N turnover and availability as grazers feed selectively on plants with high N content and thus increase the dominance of plant species with low N content[50].

## Conclusions and Implications

Our study revealed that vegetation characteristics and soil C and N storage of semiarid grassland in the agro-pastoral zone were sensitive to grazing practice. With increasing grazing intensity, the vegetation height, canopy cover, plant species abundance and aboveground biomass decreased significantly. In addition, ten years of grazing not only changed the distributions of C and N through the soil profile (0–50 cm), but also the total storages of C

and N in the soil profile. As a result, SOC and STN in the 0–50 cm were highest under UG (13.3 kg C m<sup>-2</sup> and 1.69 kg N m<sup>-2</sup>) and lowest under HG (9.8 kg C m<sup>-2</sup> and 1.22 kg N m<sup>-2</sup>). SAN was significantly lower under HG (644 kg N hm<sup>-2</sup>) than under other treatments (725–731 kg N hm<sup>-2</sup>) in the 0–50 cm.

Our results indicated that the pasture management of “take half-leave half” has potential benefits for primary production and livestock grazing, which would achieve a balance between protection of species diversity, livestock production and soil C and N management in this region. However, the “Reduce Livestock Return the Grasslands” program with grazing exclusion supported by the Ministry of Agriculture of the People’s Republic of China in 2002 was perhaps the effective choice for restoring degraded grasslands in the agro-pastoral zone. Therefore, flexible rangeland management should be adopted that suits local circumstances by balancing the demand for grassland utilization and conservation in this region. These results would be useful to the decision making on rangeland management in terms of maximizing C and N sequestration while maintaining adequate productivity for servicing the regional socio-economic development of the agro-pastoral zone in northern China.

## Acknowledgments

The authors thank Dr. I. A. White, Dr. X. Jing, and Dr. K.S. Liu for their careful language checking. We are grateful to P.G. Li, W. Yang, and X.G. Wang for their helpful assistance in the field and laboratory work. We greatly appreciate comments by the anonymous referees and academic editor on earlier versions of this paper. Our manuscript was substantially improved by the comments of Dr. I. A. White and Dr. Z.H. Shang.

## Author Contributions

Conceived and designed the experiments: MYX KW. Performed the experiments: MYX FX. Analyzed the data: MYX FX. Contributed reagents/materials/analysis tools: MYX FX. Wrote the paper: MYX.

## References

- Frank AB, Tanaka DL, Hofmann L, Follett RF (1995) Soil carbon and nitrogen of northern Great-Plains grasslands as influenced by long-term grazing. *J Range Manage* 48:470–474.
- Milchunas DG, Lauenroth WK (1993) Quantitative effects of grazing on vegetation and soils over a global range of environment. *Ecol Monogr* 63:327–366.
- Willms WD, McGinn SM, Dormaar JF (1993) Influence of litter on herbage production in the mixed grass prairie. *J Range Manage* 46:320–324.
- Hiernaux P (1998) Effects of grazing on plant species composition and spatial distribution in rangelands of the Sahel. *Plant Ecol* 138:191–202.
- McNaughton SJ, Banyikwa FF, McNaughton MM (1997) Promotion of the cycling of diet-enhancing nutrients by African grazers. *Science* 278:1798–1800.
- Milchunas DG, Lauenroth WK, Burke IC (1998) Livestock grazing: Animal and plant biodiversity of shortgrass steppe and the relationship to ecosystem function. *Oikos* 83:65–74.
- Van Haveren BP (1983) Soil bulk density as influenced by grazing intensity and soil type on a shortgrass prairie site. *J Range Manage* 36:586–588.
- Le Houerou HN, Bingham RL, Skerbek W (1988) Relationship between the variability of primary production and the variability of annual precipitation in world arid lands. *J Arid Environ* 15:1–18.
- Steffens M, Kölbl A, Totsche KU, Kögel-Knabner I (2008) Grazing effects on soil chemical and physical properties in a semiarid steppe of Inner Mongolia (P.R.China). *Geoderma* 143:63–72.
- Christensen L, Coughenour MB, Ellis JE, Chen ZZ (2004) Vulnerability of the Asian typical steppe to grazing and climate change. *Climatic Change* 63:351–368.
- Naeth MA, Chanasyk DS, Rothwell RL, Bailey AW (1991) Grazing impacts on soil water in mixed prairie and fescue grassland ecosystems of Alberta. *Can J Soil Sci* 71:313–325.
- He NP, Yu Q, Wu L, Wang YS, Han XG (2008) Carbon and nitrogen store and storage potential as affected by land-use in a *Leymus chinensis* grassland of northern China. *Soil Biol Biochem* 40:2952–2959.
- Derner JD, Schuman GE (2007) Carbon sequestration and rangelands: A synthesis of land management and precipitation effects. *J Soil Water Conserv* 62:77–85.
- Wen L, Dong SK, Li YY, Li XY, Shi JJ, et al. (2013) The impact of land degradation on the C pools in alpine grasslands of the Qinghai-Tibetan Plateau. *Plant Soil* 368:329–340.
- Bauer A, Cole CV, Black AL (1987) Soil property comparisons in virgin grasslands between grazed and nongrazed management systems. *Soil Sci Soc Am J* 51:176–182.
- Schuman GE, Reeder JD, Manley JT, Hart RH, Manley WA (1999) Impact of grazing management on the carbon and nitrogen balance of a mixed-grass rangeland. *Ecol Appl* 9:65–71.
- Wu L, He NP, Wang YS, Han XG (2008) Storage and dynamics of carbon and nitrogen in soil after grazing exclusion in *Leymus chinensis* grasslands of northern China. *J Environ Qual* 37:663–668.
- He NP, Zhang YH, Yu Q, Chen QS, Pan QM, et al. (2011) Grazing intensity impacts soil carbon and nitrogen storage of continental steppe. *Ecosphere* 2:1–10.
- Reeder JD, Schuman GE (2002) Influence of livestock grazing on C sequestration in semi-arid mixed-grass and short-grass rangelands. *Environ Poll* 116:457–463.
- Zhao Y, Peth S, Krümmelbeina J, Horn R, Wang Z, et al. (2007) Spatial variability of soil properties affected by grazing intensity in Inner Mongolia grassland. *Ecol Modell* 205:241–254.
- Huang D, Wang K, Wu WL (2007) Dynamics of soil physical and chemical properties and vegetation succession characteristics during grassland desertification under sheep grazing in an agro-pastoral transition zone in northern China. *J Arid Environ* 70:120–136.
- Gong DY, Shi PJ, Wang JA (2004) Daily precipitation changes in the semi-arid region over northern China. *J Arid Environ* 59:771–784.
- Huang D, Wang K, Wu WL (2007) Problems and strategies for sustainable development of farming and animal husbandry in the agro-pastoral transition zone in northern China(APTZNC). *Int J Sust Dev World* 14:391–399.
- Zhou ZY, Osbert JS, Huang JH, Li LH, Liu P, et al. (2007) Soil carbon and nitrogen stores and storage potential as affected by land-use in an agro-pastoral ecotone of northern China. *Biogeochemistry* 82:127–138.



25. Liu QY, Tong YP (2003) The effects of land use on the eco-environmental evolution of farming-pastoral region in northern China: With an emphasis on Duolun County in Inner Mongolia. *Acta Ecologica Sinica* 23:1025–1030.
26. Chen ZQ, Zhu ZD (2001) Development of land desertification in Bashang area in the past 20 years. *J Geogr Sci* 11:433–437.
27. Xu MY, Wang K, Xie F (2011) Effects of grassland management on soil organic carbon density in agro-pastoral zone of northern China. *Afr J Biotechnol* 10:4844–4850.
28. Chen ZZ, Wang SP (2000) Typical steppe ecosystem of China. Beijing: Science Press.
29. Ren JZ (1985) Grassland survey and planning. Beijing: Chinese Agriculture Press.
30. Bao SD (2000) Soil and agricultural chemistry analysis (third edition). Beijing: China Agricultural Press.
31. Page AL, Miller RH, Keeney DR (1983) Methods of soil analysis, Part 2: Chemical and microbiological properties (2nd edition). Madison, Wisconsin, USA: American Society of Agronomy.
32. Institute of soil science, Chinese Academy of Sciences (1978) Soil physical and chemical analysis. Shanghai: Shanghai Science & Technology Press.
33. Li YH (1993) Grazing dynamics of the species diversity in *Aneurolepidium chinense* steppe and *Stipa grandis* steppe. *Acta Bot Sin* 35:877–884.
34. Gao YH, Luo P, Wu N, Yi SL, Chen H (2007) Biomass and nitrogen responses to grazing intensity in an alpine meadow on the eastern Tibetan Plateau. *Pol J Ecol* 55:469–479.
35. Su YZ, Zhao HL, Zhang TH, Zhao XY (2004) Soil properties following cultivation and non-grazing of a semi-arid sandy grassland in northern China. *Soil Till Res* 75:27–36.
36. Gao YZ, Giese M, Lin S, Sattelmacher B, Zhao Y, et al. (2008) Belowground net primary productivity and biomass allocation of a grassland in Inner Mongolia is affected by grazing intensity. *Plant Soil* 307:41–50.
37. McNaughton SJ, Banyikwa FF, McNaughton MM (1998) Root biomass and productivity in a grazing ecosystem: The Serengeti. *Ecology* 79:587–592.
38. Naeth MA, Chanasyk DS (1995) Grazing effects on soil water in Alberta foothills fescue grasslands. *J Range Manage* 48:528–534.
39. Stavi I, Eugene DU, Hanoch L, Pariente S (2008) Grazing induced spatial variability of soil bulk density and content of water moisture, organic carbon and calcium carbonate in a semiarid rangeland. *Catena* 75:288–296.
40. Gan L, Peng XH, Peter S, Horn R (2012) Effects of grazing intensity on soil water regime and flux in Inner Mongolia grassland, China. *Pedosphere* 22:165–177.
41. Zhou ZC, Gan ZT, Shangguan ZP, Dong ZB (2010) Effects of grazing on soil physical properties and soil erodibility in semiarid grassland of the northern Loess Plateau (China). *Catena* 82:87–91.
42. Gill RA, Burke IC, Milchunas DG, Lauenroth WK (1999) Relationship between root biomass and soil organic matter pools in the shortgrass steppe of eastern Colorado. *Ecosystems* 2:226–236.
43. Holland EA, Detling JK (1990) Plant response to herbivory and belowground nitrogen cycling. *Ecology* 71:1040–1049.
44. Neff JC, Reynolds RL, Belnap J, Lamothe P (2005) Multi-decadal impacts of grazing on soil physical and biogeochemical properties in southeast Utah. *Ecol Appl* 15:87–95.
45. Liu YR, Yang C, Zhu ZM, Liu ML (2004) Soil C and N dynamics during desertification of grassland in northern China. *Ying Yong Sheng Tai Xue Bao* 15:1604–1606.
46. Liu TZ, Nan ZB, Hou FJ (2011) Grazing intensity effects on soil nitrogen mineralization in semi-arid grassland on the Loess Plateau of northern China. *Nutr Cycl Agroecosys* 91:67–75.
47. Holland EA, Parton WJ, Detling JK, Coppock DL (1992) Physiological responses of plant populations to herbivory and their consequences for ecosystem nutrient flow. *Am Nat* 140:685–706.
48. Tracy BF, Frank DA (1998) Herbivore influence on soil microbial biomass and nitrogen mineralization in a northern grassland ecosystem: Yellowstone national park. *Oecologia* 114:556–562.
49. Haynes RJ, Williams PH (1999) Influence of stock camping behaviour on the soil microbiological and biochemical properties of grazed pastoral soils. *Biol Fertl Soils* 28:253–258.
50. Leibold MA (1989) Resource edibility and the effects of predators and productivity on the outcome of trophic interactions. *Am Nat* 134:922–949.
